# Supplementary material for: Amphiphilic hyperbranched polyethyleneimine for highly efficient oil–water separation
Source: Royal Society of Chemistry journal article supplement (doi:10.1039/c9ta09640j), 2020-01-01
Supplement: c9ta09640j1.pdf [file c9ta09640j1.pdf]

## Supporting Information

### Amphiphilic Hyperbranched Polyethyleneimine for Highly Efficient Oil-Water Separation

*Shu Yan, Guijin He, Dengfeng Ye, Yongsheng Guo and Wenjun Fang\**

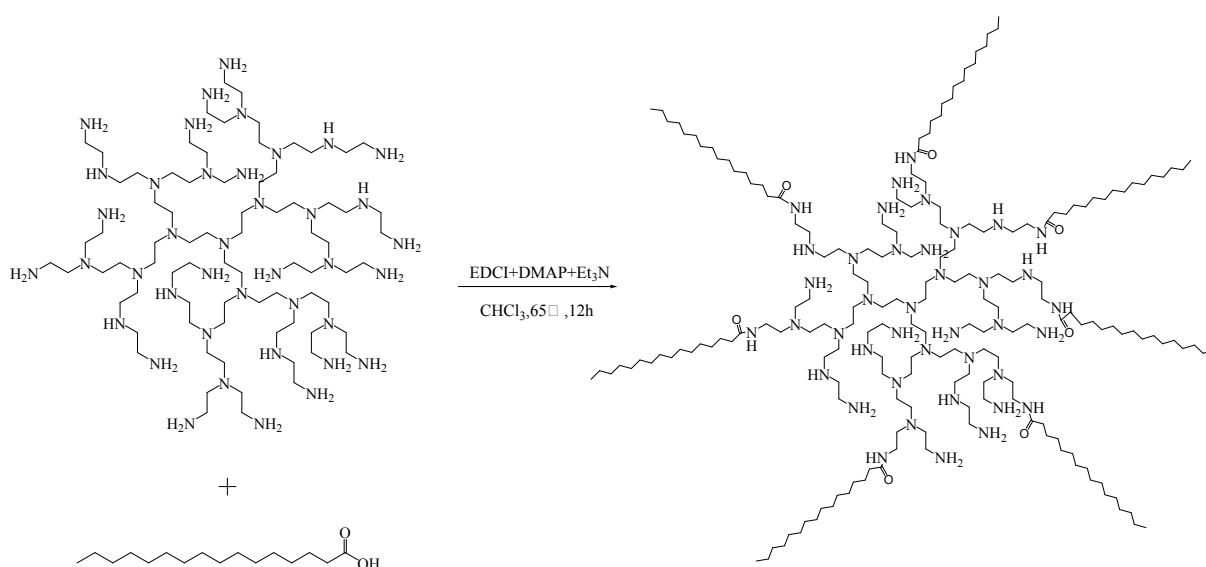

**Scheme S1** Hyperbranched polyethyleneimine (HPEI) with palmitic acid to synthesize functional HPEI-g-C<sub>16</sub>.

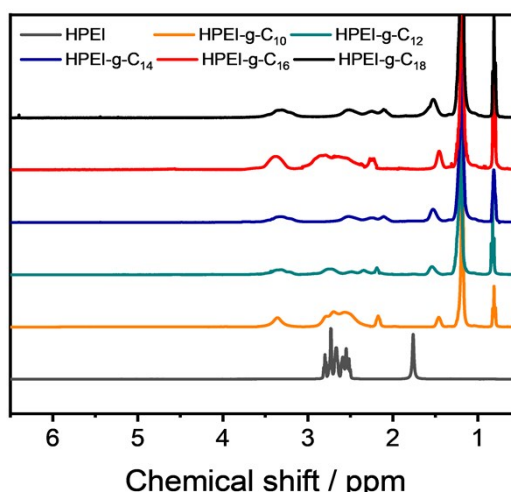

**Fig. S1** <sup>1</sup>H NMR spectra of HPEI and HPEI-g-C<sub>n</sub>.

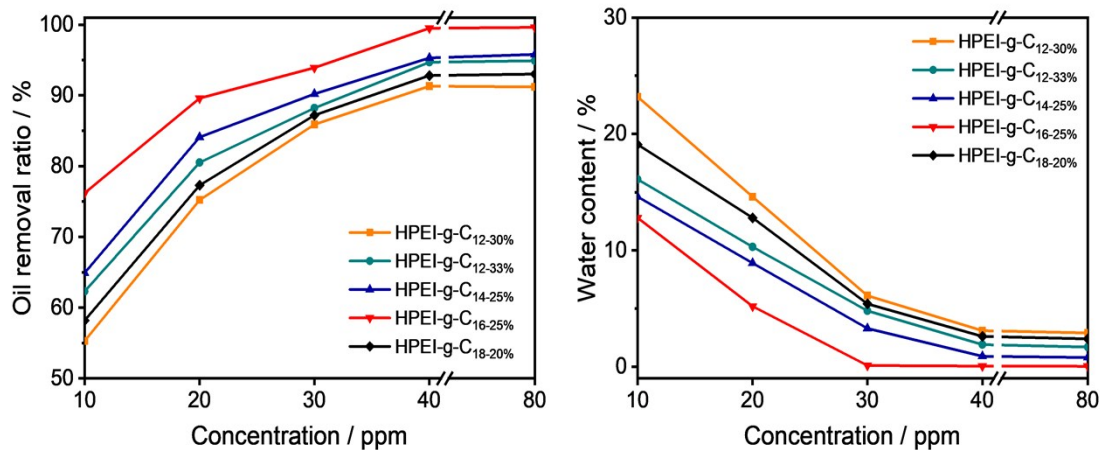

Fig. S2 Demulsification effect of HPEI-g-C<sub>n</sub> demulsifiers on emulsion containing 10 % oil after setting for 40 min at 60 °C.

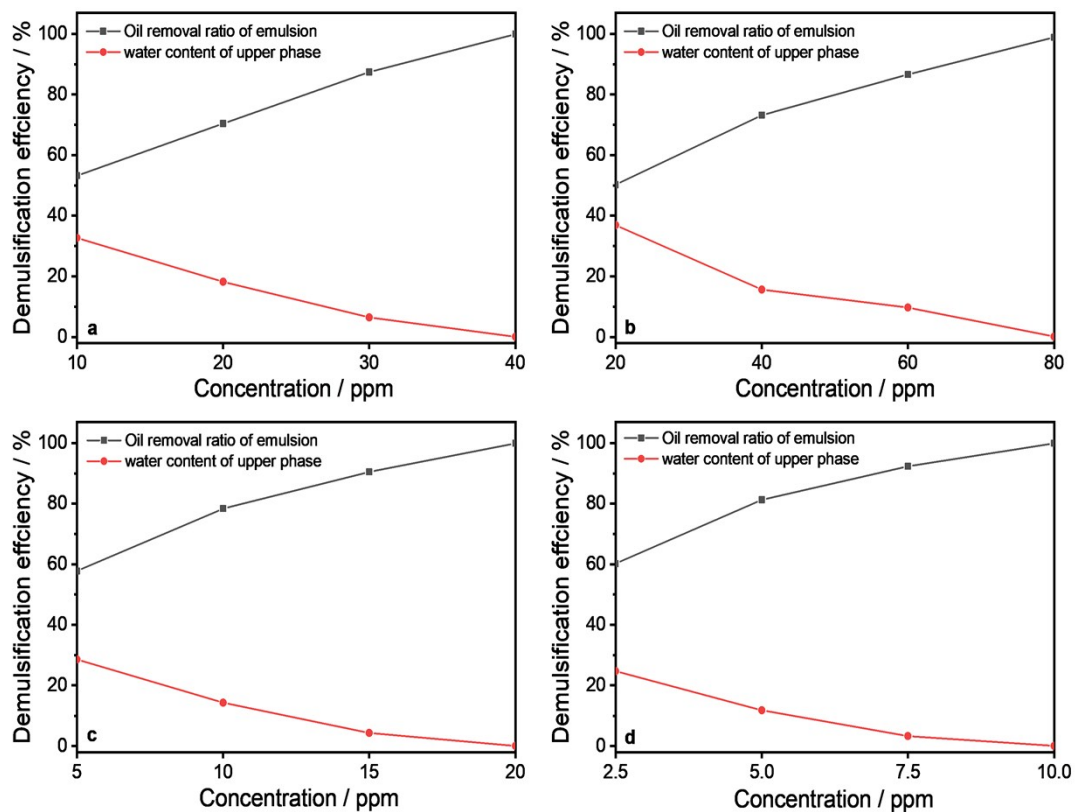

Fig. S3 Demulsification effect of HPEI-g-C<sub>16-25%</sub> demulsifier on (a) crude oil emulsions with 50.2 % water after setting for 30 min, (b) WACO emulsions after setting for 40 min, (c) toluene/ water emulsions with 0.2 % asphaltene after setting for 3min and (d) simulative emulsions with 0.1 % commercial oil after setting for 5 min.

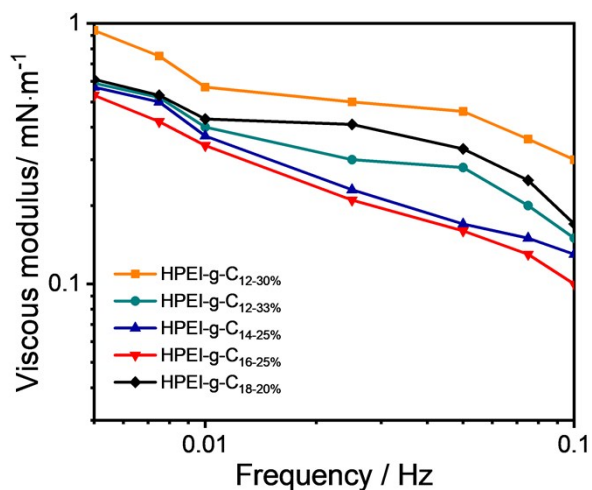

**Fig. S4** Effect of the oscillating frequency on viscous modulus of oil-water interface containing Span 80 and Tween 80 with 40 ppm HPEI-g- $C_n$  demulsifiers.

**Table S1** Characterization of synthesized HPEI and HPEI-g- $C_n$  samples.

| Polymer               | DS / % <sup>a</sup> | $T_m$ / °C <sup>b</sup> | $\Delta H_m$ / J·g <sup>-1</sup> <sup>c</sup> | Size / nm <sup>d</sup> |
|-----------------------|---------------------|-------------------------|-----------------------------------------------|------------------------|
| HPEI                  | —                   | —                       | —                                             | 5.92                   |
| HPEI-g- $C_{10-25\%}$ | 25.2                | 13.9                    | 11.6                                          | 6.12                   |
| HPEI-g- $C_{12-25\%}$ | 25.4                | 19.8                    | 15.4                                          | 6.31                   |
| HPEI-g- $C_{12-30\%}$ | 29.7                | 21.2                    | 16.9                                          | 6.43                   |
| HPEI-g- $C_{12-33\%}$ | 32.6                | 24.9                    | 17.2                                          | 6.57                   |
| HPEI-g- $C_{14-25\%}$ | 25.2                | 26.7                    | 18.6                                          | 6.82                   |
| HPEI-g- $C_{16-5\%}$  | 5.4                 | 31.7                    | 13.2                                          | 6.55                   |
| HPEI-g- $C_{16-10\%}$ | 9.8                 | 32.5                    | 17.2                                          | 6.77                   |
| HPEI-g- $C_{16-15\%}$ | 15.3                | 33.5                    | 21.7                                          | 6.93                   |
| HPEI-g- $C_{16-20\%}$ | 19.6                | 34.2                    | 23.6                                          | 7.13                   |
| HPEI-g- $C_{16-25\%}$ | 24.7                | 36.8                    | 25.7                                          | 7.21                   |
| HPEI-g- $C_{16-30\%}$ | 29.6                | 37.9                    | 27.9                                          | 7.38                   |
| HPEI-g- $C_{16-33\%}$ | 33.4                | 39.7                    | 34.8                                          | 7.59                   |
| HPEI-g- $C_{18-20\%}$ | 20.5                | 63.7                    | 43.6                                          | 8.29                   |
| HPEI-g- $C_{18-25\%}$ | 25.2                | 64.3                    | 46.3                                          | 8.73                   |

<sup>a</sup> DS is the grafting ratio of alkyl chain determined by <sup>1</sup>H NMR; <sup>b</sup>  $T_m$  and <sup>c</sup>  $\Delta H_m$  are conducted by DSC;

<sup>d</sup> Size is measured by DLS, Z-average size.

**Table S2** Characteristics of produced emulsions from two China oilfields

| Parameter          | value                     | Parameter                        | value                     |
|--------------------|---------------------------|----------------------------------|---------------------------|
| Jiangsu Oilfield   |                           |                                  |                           |
| Oil content        | 9.7 %                     | Salinity                         | 5435.5 mg L <sup>-1</sup> |
| pH                 | 9.2                       | Mg <sup>2+</sup>                 | 8.6 mg L <sup>-1</sup>    |
| Density at 293 K   | 0.8817 g cm <sup>-3</sup> | Ca <sup>2+</sup>                 | 36.4 mg L <sup>-1</sup>   |
| Viscosity at 329 K | 58.3 mPa s                | K <sup>+</sup> + Na <sup>+</sup> | 2073.6 mg L <sup>-1</sup> |
| Asphaltene         | 1.2 %                     | Cl <sup>-</sup>                  | 1822.3 mg L <sup>-1</sup> |
| Resin              | 14.83 %                   | HCO <sub>3</sub> <sup>-</sup>    | 1725.5 mg L <sup>-1</sup> |
| Liaohe Oilfield    |                           |                                  |                           |
| Oil content        | 13.4 %                    | Salinity                         | 8608.2 mg L <sup>-1</sup> |
| pH                 | 8.7                       | Mg <sup>2+</sup>                 | 2.5 mg L <sup>-1</sup>    |
| Density at 293 K   | 0.9864 g cm <sup>-3</sup> | Ca <sup>2+</sup>                 | 19.3 mg L <sup>-1</sup>   |
| Viscosity at 329 K | 321 mPa s                 | K <sup>+</sup> + Na <sup>+</sup> | 3621.2 mg L <sup>-1</sup> |
| Asphaltene         | 3.2 %                     | Cl <sup>-</sup>                  | 5520.7 mg L <sup>-1</sup> |
| Resin              | 35.83 %                   | HCO <sub>3</sub> <sup>-</sup>    | 1061.2 mg L <sup>-1</sup> |
